# Supplementary material
Source: PubMed Central journal article supplement (PMC3758236)
Supplement: NIHMS501797-supplement-supp_figs.pdf [file NIHMS501797-supplement-supp_figs.pdf]

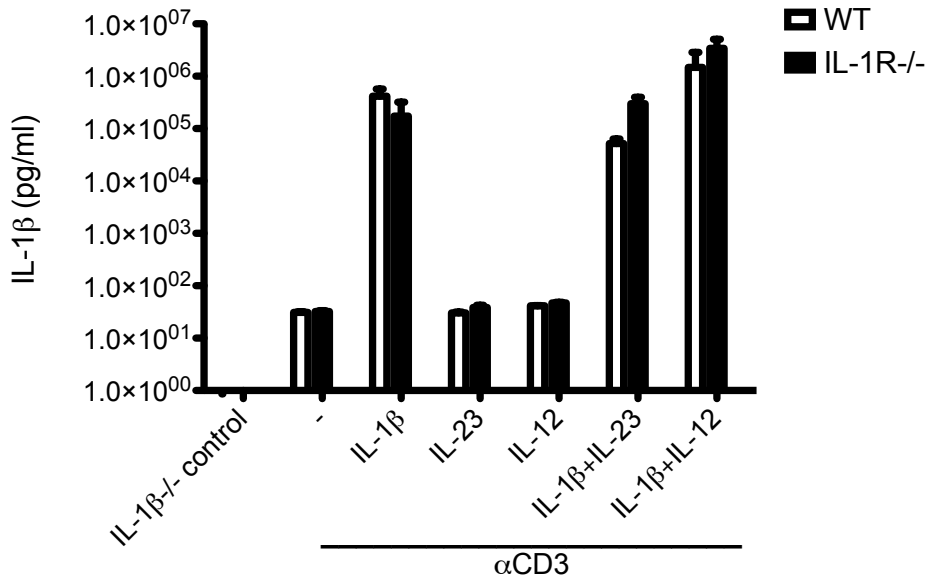

**Supplemental Figure 1. Anti-CD3 stimulation induces low but detectable levels of IL-1 $\beta$ .** Splenocytes and lymph node cells were harvested from wild-type (WT) or IL-1R<sup>-/-</sup> mice. Cells were stimulated with anti-CD3 in the presence of IL-1 $\beta$ , IL-23, IL-1 $\beta$  and IL-23, IL-12, or IL-12 and IL-1 $\beta$ . As a control, dLN cells from IL-1 $\beta$ <sup>-/-</sup> mice that were immunized with MOG/CFA were collected on day 10 and restimulated with MOG peptide. Supernatants were collected at 72 hrs for analysis of IL-1 $\beta$  production by ELISA. Data are representative of four independent experiments with 2-3 mice per group. Data represent mean  $\pm$  SEM.

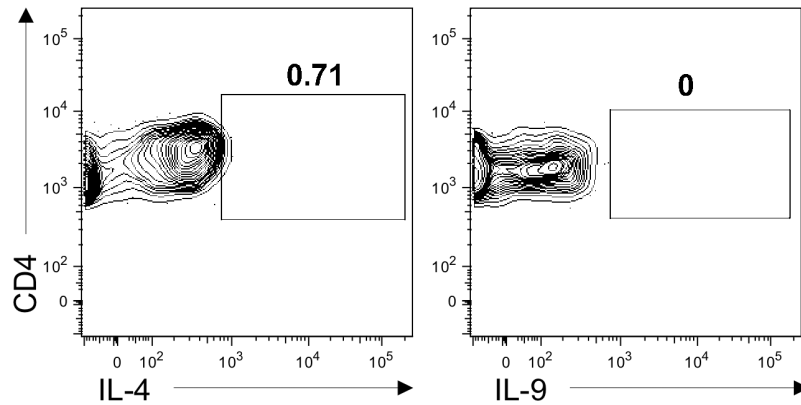

**Supplemental Figure 2. Pathogenic CD4<sup>+</sup>GM-CSF<sup>+</sup>IL-17<sup>+</sup>IFN- $\gamma$ <sup>-</sup> T cells are not T<sub>H</sub>2 or T<sub>H</sub>9 cells.** WT mice were immunized with MOG/CFA. On day 33, splenocytes were stimulated with PMA/ionomycin for 5 hrs followed by intracellular staining for GM-CSF, IL-17, IFN- $\gamma$ , IL-4, and IL-9. CD4<sup>+</sup> T cells that produce GM-CSF were gated and then this population was expanded to evaluate the expression of IL-17 and IFN- $\gamma$ . The levels of IL-4 (left panel) and IL-9 (right panel) was assessed in the CD4<sup>+</sup>GM-CSF<sup>+</sup>IL-17<sup>+</sup>IFN- $\gamma$ <sup>-</sup> T cell population. Data are representative of eight mice.

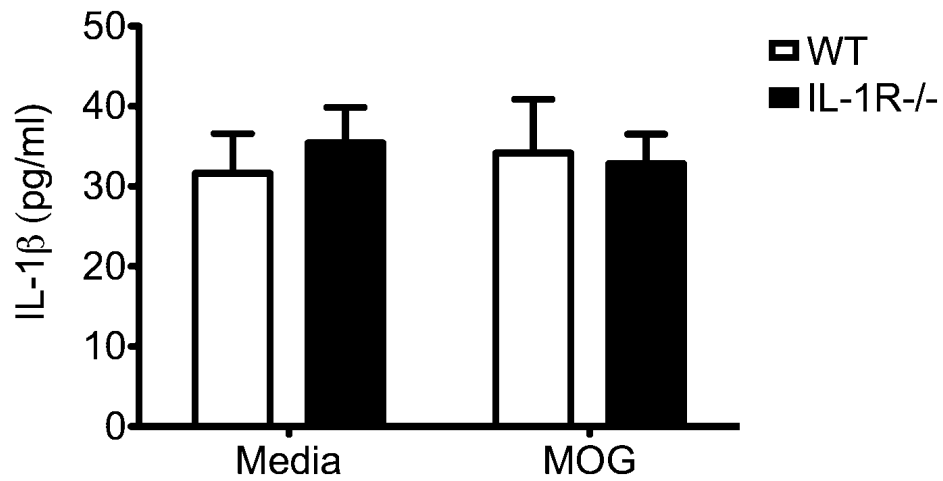

**Supplemental Figure 3. No difference in IL-1 $\beta$  levels in the absence of IL-1R during EAE.** WT and IL-1R<sup>-/-</sup> mice were immunized with MOG/CFA. (A) On day 10, splenocytes were stimulated for 48 hrs with MOG peptide and IL-1 $\beta$  was measured by ELISA. Data are representative of four independent experiments with at least 4 mice per group.
